# Supplementary material for: Prunetin 4′-O-Phosphate, a Novel Compound, in RAW 264.7 Macrophages Exerts Anti-Inflammatory Activity via Suppression of MAP Kinases and the NFκB Pathway
Source: MDPI journal article supplement (doi:10.3390/molecules26226841), 2021-11-12
Supplement: s1 [file s1]

Article

# Prunetin 4'-O-Phosphate, a Novel Compound, in RAW 264.7 Macrophages Exerts Anti-Inflammatory Activity via Suppression of MAP Kinases and the NFκB Pathway

Taejin Park <sup>1</sup>, Hye Hyun Hong <sup>1</sup>, Min-Seon Kim <sup>2</sup>, Jin-Soo Park <sup>2</sup>, Won-Jae Chi <sup>3</sup> and Seung-Young Kim <sup>1,\*</sup>

<sup>1</sup> Department of Pharmaceutical Engineering & Biotechnology, Sunmoon University, Asan 31460, Korea; bark.taejin@gmail.com (T.P.); kongjjo123@naver.com (H.H.)

<sup>2</sup> Natural Product Informatics Research Center, Korea Institute of Science and Technology, Gangneung 25451, Korea; nari7040@gmail.com (M.-S.K.); jinsoopark@kist.re.kr (J.-S.P.)

<sup>3</sup> Genetic Resources Assessment Division, National Institute of Biological Resources, Incheon 22689, Korea; wjchi76@korea.kr

\* Correspondence: sykim01@sunmoon.ac.kr; Tel.: +82-41-530-2390

PROTON 01  
P4P (500MHz NMR DMSO)

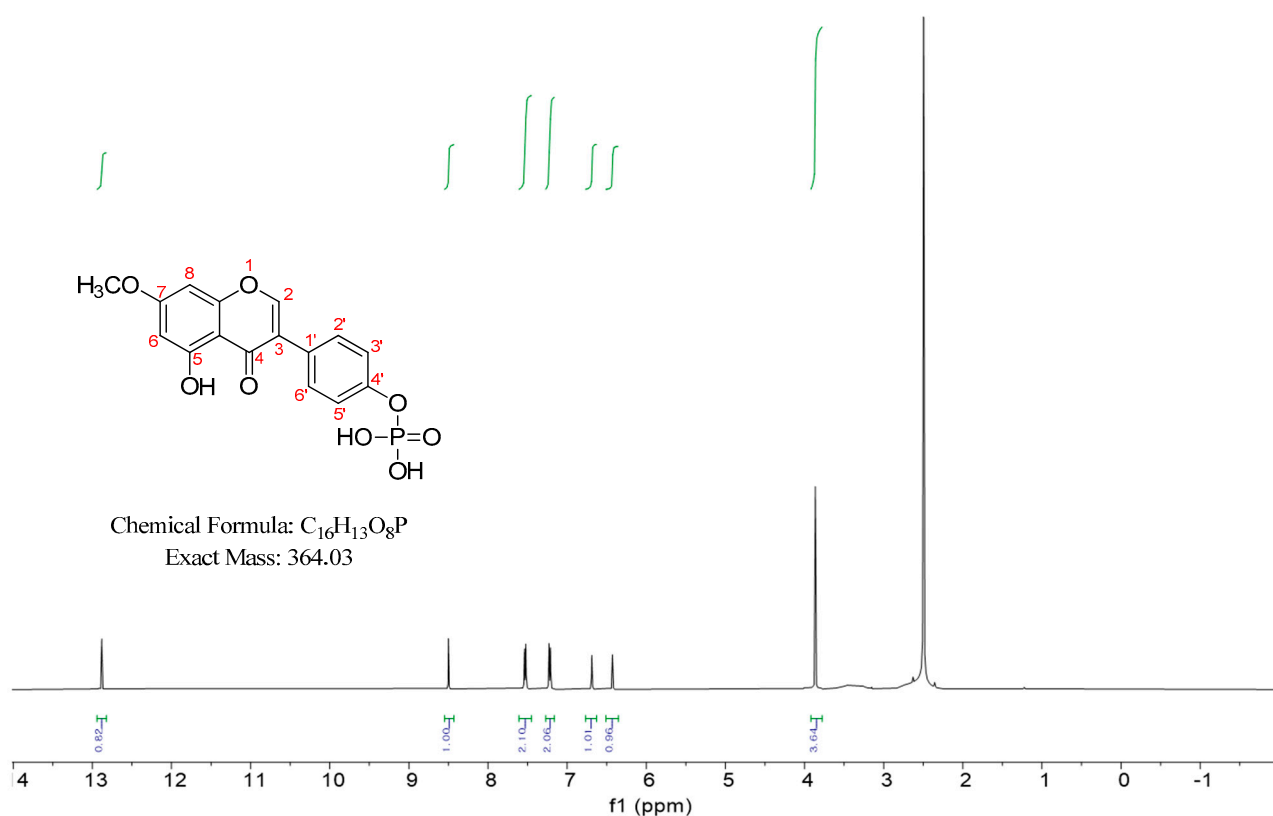

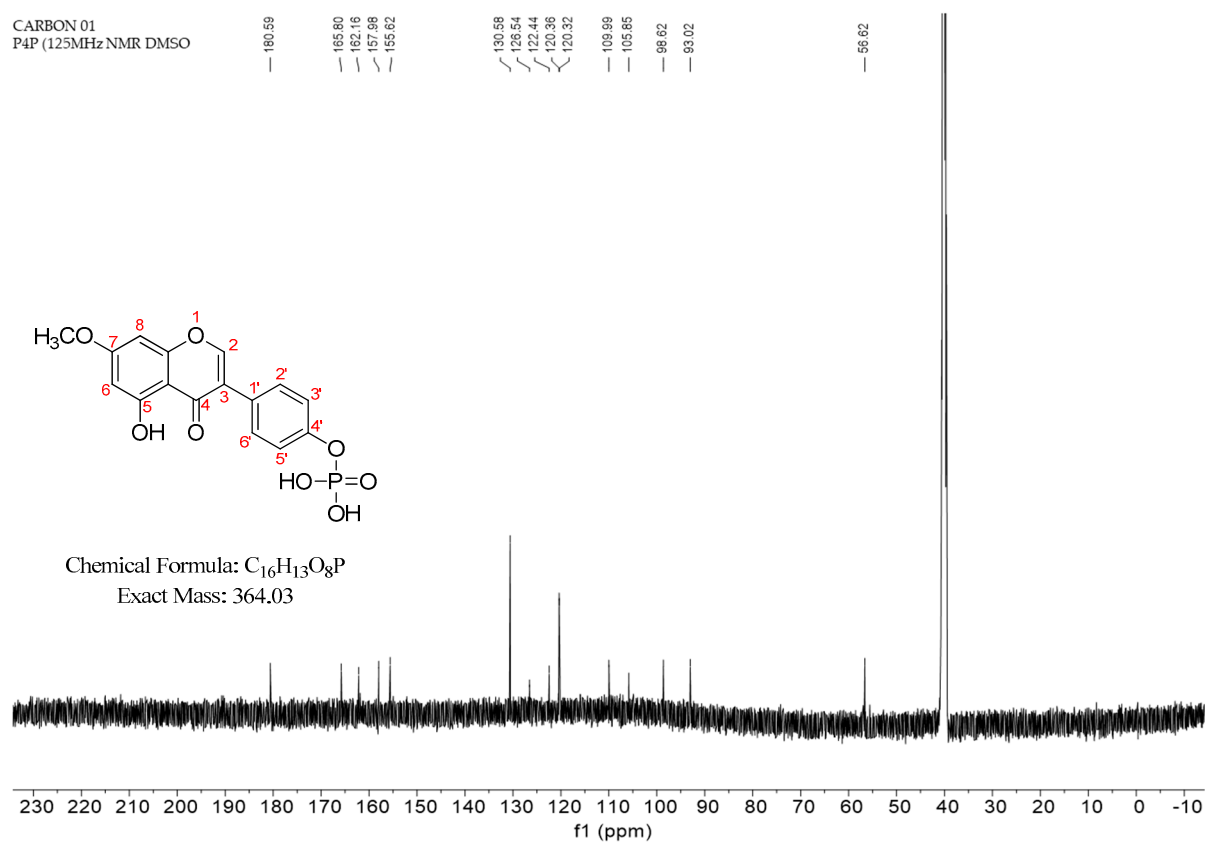

**Figure S2.** <sup>13</sup>C-NMR spectrum of prunetin 4'-O-phosphate (P4P, 1).

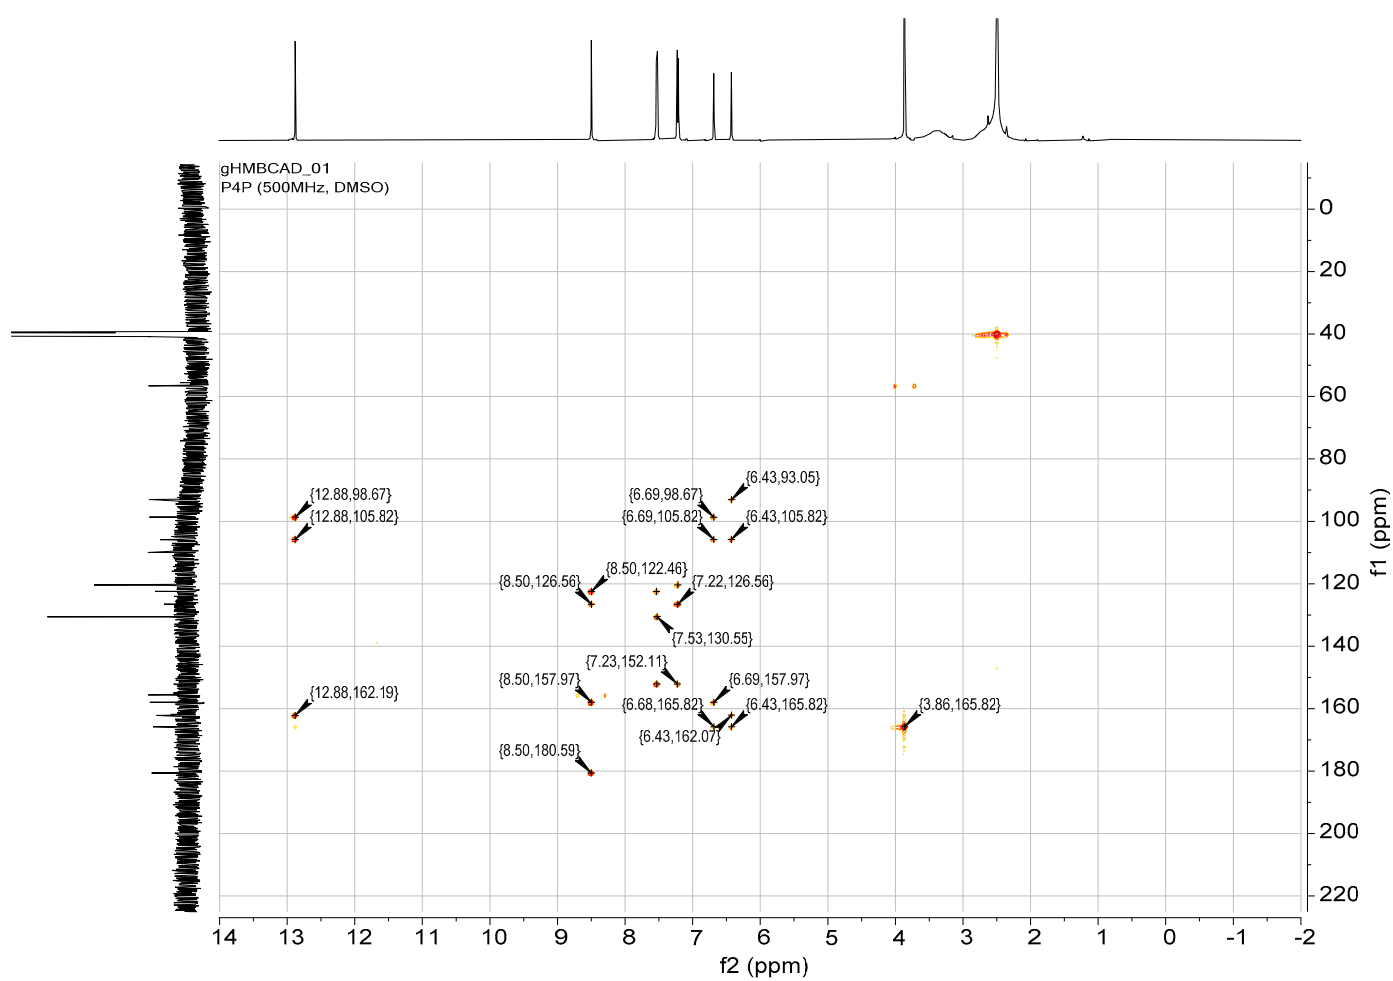

Figure S3. HMBC correlation of prunetin 4'-O-phosphate (P4P, 1).

**Table S1.**  $^1\text{H}$  (DMSO- $d_6$ , 500 MHz NMR) and  $^{13}\text{C}$  (DMSO- $d_6$ , 125 MHz NMR) NMR chemical shifts of prunetin 4'-O-phosphate (P4P, 1).

| Compound                                                                                                                                                                                   | No.                | $^1\text{H}$ | $^{13}\text{C}$ |
|--------------------------------------------------------------------------------------------------------------------------------------------------------------------------------------------|--------------------|--------------|-----------------|
| 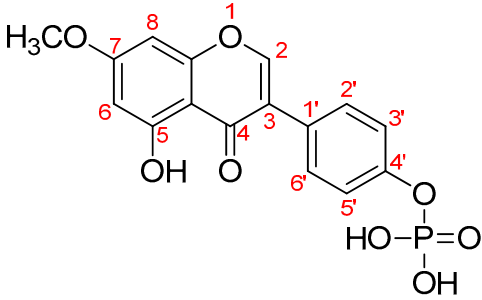 <p>Chemical Formula: <math>\text{C}_{16}\text{H}_{13}\text{O}_8\text{P}</math><br/>Exact Mass: 364.03</p> | 2                  | 8.40 s       | 155.62          |
|                                                                                                                                                                                            | 3                  |              | 122.44          |
|                                                                                                                                                                                            | 4                  |              | 180.59          |
|                                                                                                                                                                                            | 5                  |              | 162.16          |
|                                                                                                                                                                                            | 6                  | 6.42 d       | 98.62           |
|                                                                                                                                                                                            | 7                  |              | 165.8           |
|                                                                                                                                                                                            | 8                  | 6.68 d       | 93.05           |
|                                                                                                                                                                                            | 9                  |              | 157.98          |
|                                                                                                                                                                                            | 10                 |              | 105.85          |
|                                                                                                                                                                                            | 1'                 |              | 126.54          |
|                                                                                                                                                                                            | 2' and 6'          | 7.53 d       | 130.58          |
|                                                                                                                                                                                            | 3' and 5'          | 7.22 d       | 120.34 d        |
|                                                                                                                                                                                            | 4'                 |              | 152.11          |
|                                                                                                                                                                                            | 5-OH               | 12.87 s      |                 |
|                                                                                                                                                                                            | 7-OCH <sub>3</sub> | 3.87 s       | 56.62           |
